# Supplementary material for: Development of nanoparticles derived from corn as mass producible bionanoparticles with anticancer activity
Source: PubMed Central journal article supplement (PMC8613273; doi:10.1038/s41598-021-02241-y), 2021-11-24
Supplement: 41598_2021_2241_MOESM1_ESM.pdf [file 41598_2021_2241_MOESM1_ESM.pdf]

## **Supplementary Information**

### **Development of nanoparticles derived from corn as mass producible bionanoparticles with anticancer activity**

Daisuke Sasaki<sup>1</sup>, Kosuke Kusamori<sup>1</sup>, Yukiya Takayama<sup>1</sup>, Shoko Itakura<sup>2</sup>, Hiroaki Todo<sup>2</sup>,  
and Makiya Nishikawa<sup>1\*</sup>

<sup>1</sup>Laboratory of Biopharmaceutics, Faculty of Pharmaceutical Sciences, Tokyo University  
of Science, 2641 Yamazaki, Noda, Chiba 278-8510, Japan

<sup>2</sup>Faculty of Pharmacy and Pharmaceutical Sciences, Josai University, 1-1 Keyakidai,  
Sakado, Saitama 350-0295, Japan

\*Corresponding author: Makiya Nishikawa, Ph.D.

Tel.: +81-4-7121-4450

Fax.: +81-4-7121-4450

E-mail address: [makiya@rs.tus.ac.jp](mailto:makiya@rs.tus.ac.jp)

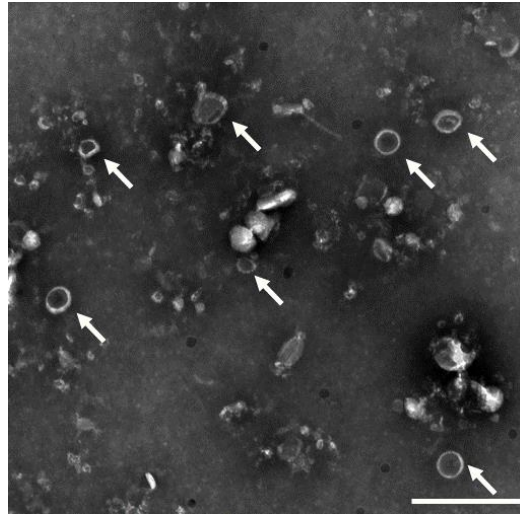

**Fig. S1. TEM image of cNPs at low magnification.** A TEM image was captured using H-7650 TEM. The scale bar indicates 500 nm. White arrows indicate cNPs.

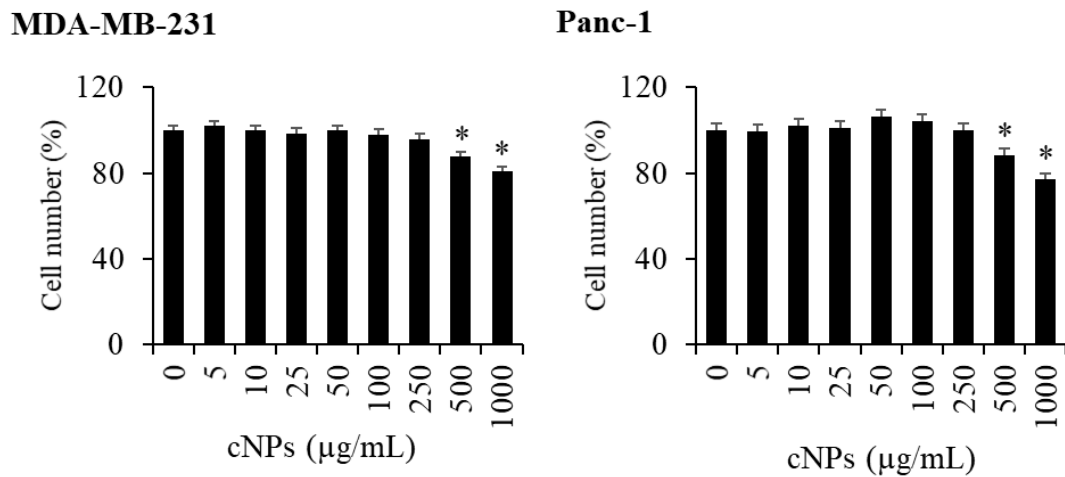

**Fig. S2. Cell number after incubation with cNPs.** Cell number was measured by CCK8 assay after 24 h of cNP addition. MDA-MB-231 and Panc-1 cells were incubated with 5–1000 µg/mL of cNPs. Results are expressed as the mean  $\pm$  SD of four samples. \* $p < 0.05$  vs. 0 µg/mL cNP

group.

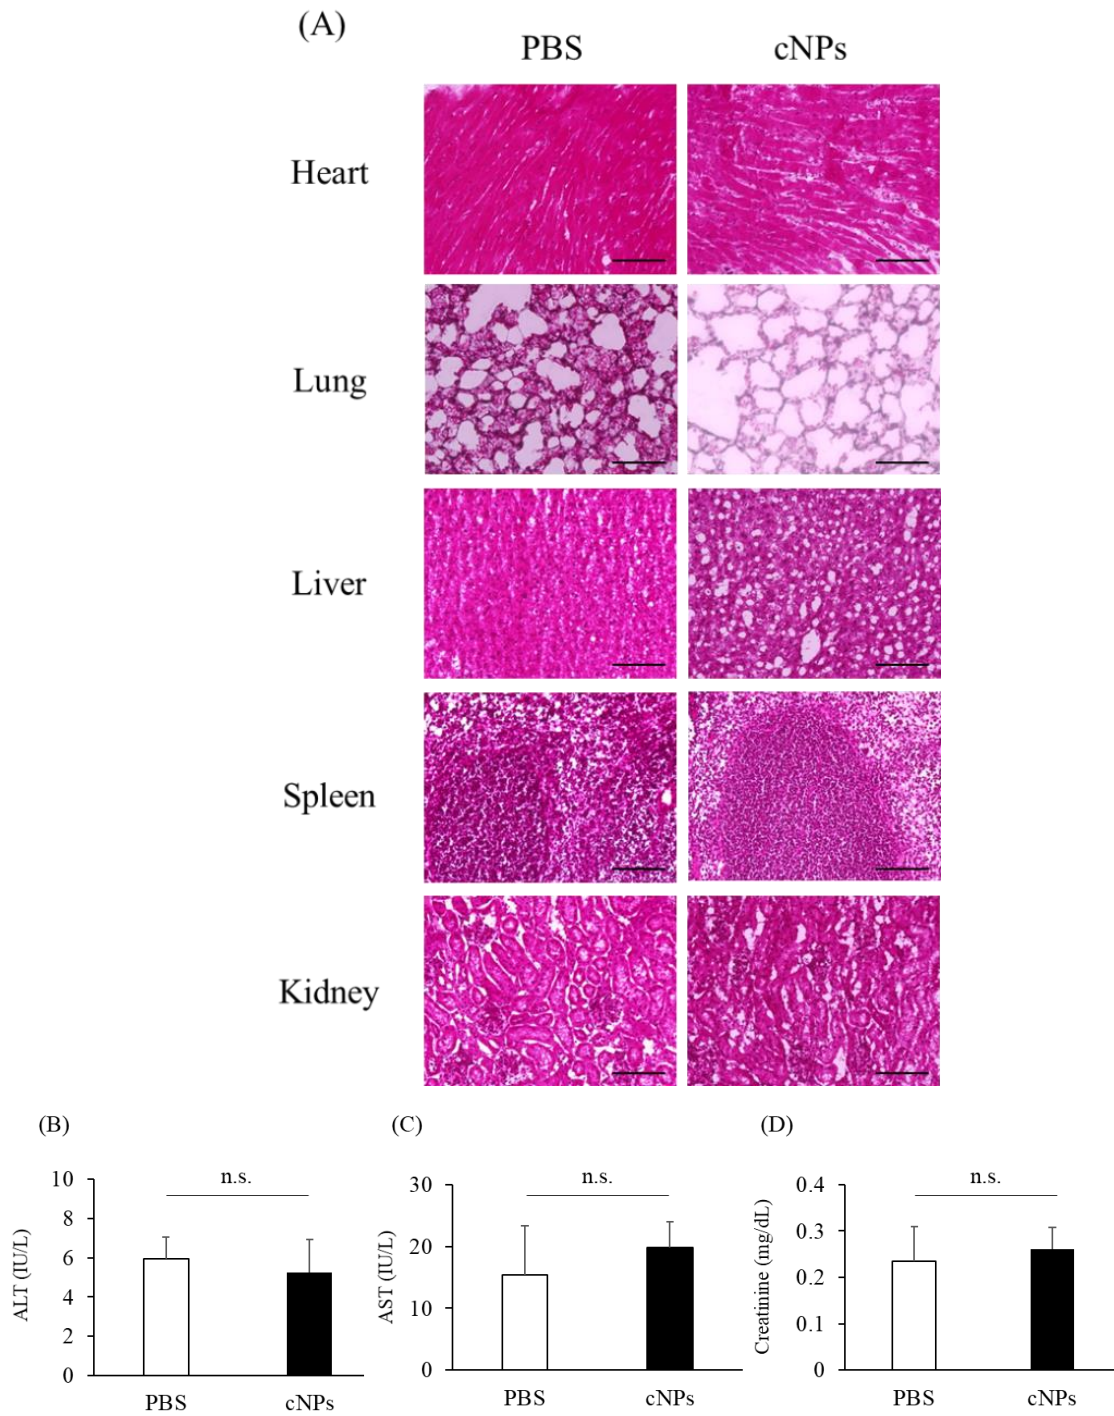

**Fig. S3. Adverse effects in mice after cNP injection.** PBS or cNPs (1000  $\mu\text{g}/\text{mL}$ ) were

subcutaneously injected to the back area of BALB/c mice every day. On day 7, organs and blood were collected, and blood was incubated on ice overnight. The extracted organs were sectioned, and H&E stained. (A) H&E stained tissue sections. Scale bars indicate 100  $\mu$ m. (B-D) Serum levels of AST (B), ALT (C), and creatinine (D).

Table S1. Peak area ratio of phospholipids in cNPs

| Phospho-<br>lipids | Acyl chain * | Peak area ratio (sample/IS) |                                                   |
|--------------------|--------------|-----------------------------|---------------------------------------------------|
|                    |              | cNPs                        | Corn homogenized juice<br>(before centrifugation) |
| LPC                | 16:0         | 0.224 $\pm$ 0.032           | 0.070 $\pm$ 0.003                                 |
|                    | 18:1         | 0.107 $\pm$ 0.016           | 0.022 $\pm$ 0.003                                 |
|                    | 18:2         | 0.115 $\pm$ 0.020           | 0.018 $\pm$ 0.002                                 |
| PC                 | 16:0-16:0    | 0.018 $\pm$ 0.005           | N.D.                                              |
|                    | 16:0-18:0    | 0.020 $\pm$ 0.006           | N.D.                                              |
|                    | 16:0-18:1    | 0.410 $\pm$ 0.049           | 0.142 $\pm$ 0.010                                 |
|                    | 16:0-18:2    | 0.597 $\pm$ 0.100           | 0.187 $\pm$ 0.012                                 |
|                    | 16:0-18:3    | 0.011 $\pm$ 0.003           | N.D.                                              |
|                    | 18:0-18:1    | 0.011 $\pm$ 0.002           | N.D.                                              |
|                    | 18:1-18:1    | 0.953 $\pm$ 0.137           | 0.297 $\pm$ 0.008                                 |
|                    | 18:1-18:2    | 1.303 $\pm$ 0.243           | 0.474 $\pm$ 0.007                                 |
|                    | 18:1-18:3    | 0.012 $\pm$ 0.006           | N.D.                                              |
|                    | 18:2-18:2    | 1.010 $\pm$ 0.111           | 0.261 $\pm$ 0.025                                 |
|                    | 18:2-18:3    | 0.015 $\pm$ 0.005           | N.D.                                              |
|                    | LPE          | 16:0                        | 0.011 $\pm$ 0.003                                 |
| 18:1               |              | 0.016 $\pm$ 0.003           | N.D.                                              |
| PE                 | 16:0-18:1    | 0.035 $\pm$ 0.007           | 0.006 $\pm$ 0.005                                 |
|                    | 16:0-18:2    | 0.100 $\pm$ 0.012           | 0.030 $\pm$ 0.007                                 |
|                    | 16:0-20:1    | 0.021 $\pm$ 0.003           | N.D.                                              |
|                    | 18:1-18:1    | 0.076 $\pm$ 0.027           | 0.018 $\pm$ 0.006                                 |
|                    | 18:1-18:2    | 0.267 $\pm$ 0.046           | 0.085 $\pm$ 0.011                                 |
|                    | 18:2-18:2    | 0.440 $\pm$ 0.047           | 0.125 $\pm$ 0.012                                 |

|    |           |               |               |
|----|-----------|---------------|---------------|
| PG | 16:0-16:0 | 0.604 ± 0.017 | N.D.          |
|    | 14:0-20:1 | 0.009 ± 0.003 | N.D.          |
|    | 16:0-18:1 | 1.373 ± 0.168 | 0.036 ± 0.003 |
|    | 16:0-18:2 | 0.139 ± 0.020 | N.D.          |
| PS | 16:0-18:2 | 0.015 ± 0.006 | N.D.          |
| SM | 18:1-20:0 | 0.020 ± 0.005 | N.D.          |
|    | 18:1-22:1 | 0.010 ± 0.005 | N.D.          |

Results are expressed as the mean ± SD. N.D.: Not detected.

LPC: Lysophosphatidylcholine, PC: Phosphatidylcholine, LPE: Lysophosphatidylethanolamine, PE: Phosphatidylethanolamines, PG: Phosphatidylglycerol, PS: Phosphatidylserine, SM: Sphingomyelin.

\*The numbers indicate the carbon number and degree of unsaturation of the acyl chains of phospholipids.
